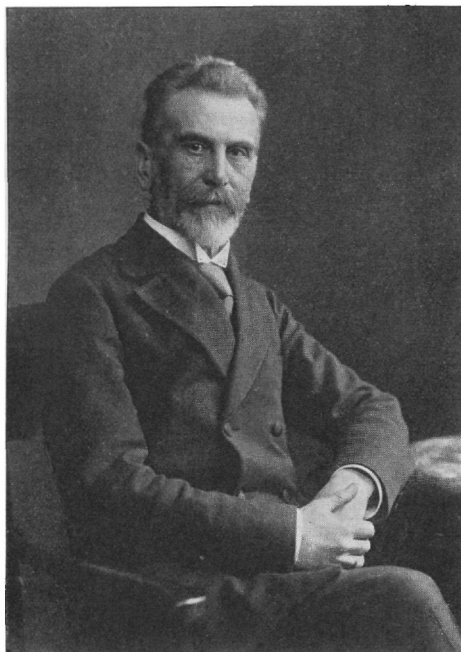

**Karl Brandt,**  
gestorben am 7. Januar 1931.

---

**K**ARL BRANDT ist am 23. Mai 1854 in Magdeburg geboren. Er studierte Naturwissenschaften hauptsächlich in Berlin und promovierte 1877 in Halle mit einer Arbeit über Actinosphaerium zum Dr. phil. Von 1878—82 war er Assistent am Berliner physiologischen Institut unter DUBOIS-REYMOND, arbeitete von 82—85 an der Zoologischen Station in Neapel und ging von da, nach

Königsberg, wo er sich im Juli 1885 als Privatdozent für Zoologie habilitierte. Im April '87 wurde er mit der Vertretung von KARL MÖBIUS betraut, dessen Nachfolger er ein Jahr später als Professor der Zoologie und als Direktor des Zoologischen Instituts und Museums der Kieler Universität wurde. Von 1887 bis 1913 hielt BRANDT auch Vorlesungen an der Marineakademie. Von 1888 an war er Mitglied der Preussischen Kommission zur wissenschaftlichen Untersuchung der deutschen Meere, trat im Februar 1901 bei der Gründung der Deutschen wissenschaftlichen Kommission für internationale Meeresforschung auch dieser als Mitglied bei und leitete ihr Kieler Biologisches Meereslaboratorium. Im Oktober 1922 wurde BRANDT von seinen amtlichen Verpflichtungen der Universität gegenüber entbunden, arbeitete aber bis zu seinem Tode an der Lösung von Aufgaben aus dem Gebiete der Meeresforschung weiter, die ihm reiche Förderung verdankt.

BRANDT'S wissenschaftliche Tätigkeit ging von der Untersuchung einzelliger Tiere aus, an denen neben dem Bau besonders die Entwicklung und die Anpassungen an die Umwelt ihn fesselten. Als grundlegende Arbeiten aus diesem Gebiete seien neben seiner Dissertation über *Actinosphaerium* die »Monographie der koloniebildenden Radiolarien« aus Neapel und »Die Tintinnen« als ein Ergebnis seiner Teilnahme an der Plankton-Expedition genannt. Von allergrösster Bedeutung ist aus seiner Neapler Zeit aber die Feststellung über das Wesen der »Gelben Körperchen«, der Zooxanthellen, im Plasma der Radiolarien geworden, deren Natur als einzellige Algen BRANDT wissenschaftlich einwandfrei klarlegte und dadurch der Mitbegründer der Lehre von der Symbiose in der besonderen Form des Aufenthalts von einzelligen Pflanzen in lebenden Tierzellen wurde. Diese Forschungen bildeten aber auch die Brücke zu seinem späteren Hauptarbeitsgebiete, dem Stoffumsatz im Meere.

In Kiel beschäftigten BRANDT zunächst Fragen nach dem Einfluss der Konzentration des Salzgehaltes des Meerwassers auf die Seetiere. Es war das ein Aufgabenkomplex, mit dem sich schon MÖBIUS eingehend befasst hatte. BRANDT stellte in ausführlichen Tabellen die Abnahme in der Zahl der Tierarten von der Nordsee über Kattegat und westliche Ostsee bis in den Finnischen und Bottnischen Busen hinein dar und verfolgte auch die Wirkung

des verminderten Salzgehaltes auf Grösse und relative Schalendicke bei einer Reihe euryhaliner Mollusken, die von der Nordsee bis in die östliche Ostsee hinein auftreten. Nach Vollendung des Nord-Ostsee-Kanals untersuchte BRANDT das Vordringen von Meerestieren vom Kieler Hafen aus in dem von der Elbe her mit Süsswasser gespeisten Kanal längere Zeit hindurch und wertete so ein Experiment wissenschaftlich aus, wie es in so grossen Ausmassen nur selten sich darbietet.

Von entscheidendem Einfluss auf die Richtung, die BRANDT's Forschungen über den Stoffwechsel nehmen sollten, wurde in Kiel aber sein Zusammenarbeiten mit VICTOR HENSEN, dessen Methoden der quantitativen Planktonforschung es ihm ermöglichten, Vergleiche zwischen den durch quantitative chemische Analyse feststellbaren gelösten Pflanzennährstoffen des Meeres und der Menge der sie verarbeitenden Pflanzen durchzuführen und daneben dem Mengenverhältnis von produzierenden Pflanzen und konsumierenden Tieren nachzugehen. Das LIEBIG'sche Gesetz vom Minimum, auf dessen Anwendbarkeit auf die Pflanzenerzeugung im Meere BRANDT seine Lehre stützte, wird jetzt allgemein als eine der Grundlagen des Stoffumsatzes im Meere anerkannt. In EMIL RABEN hatte BRANDT einen Mitarbeiter gewonnen, der mit grossem Erfolg die Verfeinerung der Methoden zur quantitativen Feststellung der im Meerwasser spurenweise vertretenen Pflanzennährstoffe (Phosphorsäure, Nitrat, Kieselsäure) gefördert hat. Aber auch die späteren zum Teil ganz wesentlichen Verbesserungen dieser Technik hat BRANDT ständig seinem Lehrgebäude nutzbar gemacht, dem er später auch noch die energetischen Wachstumsfaktoren Licht und Wärme einfügte.

BRANDT's Abhandlungen zum Stoffwechsel im Meere sind hauptsächlich in den »Wissenschaftlichen Meeresuntersuchungen, Abtlg. Kiel«, in den »Rapports et Procès-Verbaux des Réunions« und in den »Berichten der Deutschen Wissenschaftlichen Kommission für Meeresforschung« erschienen.

Der Tod hat KARL BRANDT mitten in der Arbeit ereilt: die steigende Anerkennung seiner wissenschaftlichen Lebensarbeit hat seinen Lebensabend verschönt!

J. REIBISCH.
